# Supplementary material
Source: publisher figshare collection journal article supplement (https://tandf.figshare.com/articles/dataset/_/20285658)
Supplement: Supplementary file 1 [file 1]

Link Siemens-mobility: “<https://www.mobility.siemens.com/global/en/portfolio/rail/rolling-stock/components-and-systems.html>“
